# Supplementary material for: Mechanochemical synthesis of drug–drug eutectics of the antibacterial agent, linezolid
Source: Royal Society of Chemistry journal article supplement (doi:10.1039/d3ce00214d), 2023-01-01
Supplement: d3ce00214d1.pdf [file d3ce00214d1.pdf]

# **Mechanochemical screening of drug-drug eutectics of the antibacterial agent, linezolid**

**Cinu Winson and Sunil Varughese\***

Supporting Information

|                  | <b>Contents</b>                                                           | <b>Page No.</b> |
|------------------|---------------------------------------------------------------------------|-----------------|
| ➤                | Experimental details                                                      | 3-5             |
| <b>Figure S1</b> | HSM images                                                                | 6               |
| <b>Figure S2</b> | Binary Phase Diagram                                                      | 7               |
| <b>Figure S3</b> | FTIR Spectra                                                              | 8-11            |
| <b>Figure S4</b> | PXRD Results                                                              | 12              |
| <b>Figure S5</b> | DSC results                                                               | 13              |
| <b>Figure S6</b> | SEM images                                                                | 14              |
| <b>Figure S7</b> | Statistical representation of solubility                                  | 15              |
| <b>Figure S8</b> | The hardness of the tablet prepared at 75 kg/cm <sup>2</sup> of pressure. | 15              |
| <b>Figure S9</b> | MESP Analysis                                                             | 16              |
| <b>Table S1</b>  | CCDC Search result                                                        | 17              |
| <b>Table S2</b>  | Melting Temperature of Multicomponent system                              | 17              |
| <b>Table S3</b>  | Corresponding values of solubility                                        | 18-21           |
| <b>Table S4</b>  | Availability of LZD in eutectic mixture                                   | 22              |
| <b>Table S5</b>  | Availability of coformer drug in eutectic mixture                         | 22              |

## **Experimental details**

### ***Materials:***

The APIs are purchased from various suppliers, and used without further purification. The HPLC grade methanol from Merck (99.9% pure) was used for liquid-assisted grinding.

### ***Mechanochemical Synthesis by LAG:***

For the preparation of solid forms performing LAG with methanol using LABINDIA MM1100 Micro Ball Mill. All the drug-drug combinations were prepared using the mechanochemical route in various stoichiometric ratios. For every LAG experiment, maintained the  $\eta$  value (solvent/solute) ranges between  $\sim 0.1$ -  $0.5 \mu\text{L}/\text{mg}$ .

The LABINDIA micro ball mill is equipped with a 5 mL stainless steel jar and one 7 mm diameter grinding ball per jar milled at 900 rpm (15 Hz) for 30 min (3 cycles of 10 min). The resultant powder was analysed using PXRD and melting point to confirm whether it is a molecular complex or eutectic mixture.

### ***Differential Scanning Calorimetry (DSC):***

DSC thermogram acquired using a METTLER TOLEDO DSC (STARe system) unit. using 40  $\mu\text{L}$  aluminium crucibles with approximately 5-7 mg of the sample under a dynamic nitrogen atmosphere (40 mL/min) and a heating rate of 10  $^{\circ}\text{C}/\text{min}$  in the temperature range from 60 to 200 $^{\circ}\text{C}$ .

### ***Optical and Hot-Stage Microscope (HSM):***

Based on the thermal information from the optical and Hot-Stage Microscope (HSM) studies, we constructed the phase diagram to determine the eutectic point. The binary phase diagrams correlate the melting temperatures of different drug compositions with respect to the mole fraction of LZD.

### ***Powder X-ray Diffraction (PXRD)***

On a Philips X' pert Pro with Cu K radiation (1.54056) at room temperature, we measured the diffractions experiments for the drug-drug combinations at varying stoichiometric proportions. Further, we collected the diffraction data of the materials post-dissolution (after 24 hours) to determine their phase stability.

That is LZD-HAD, LZD-ASA, LZD-IND, LZD-PHE, LZD-OSB, LZD-SMX, and, LZD-STZ, in 1:1,2:1,2:3,3:7,1:1,1:1, and, 2:1 respectively.

***Scanning Electron Microscopy (SEM):***

Micrographs were obtained using a Hitachi Tabletop JEOL 5600 SL scanning electron microscope operated in the range of 5–30 kV. The samples were prepared by drop casting on silicon wafer pasted in a carbon double-sided adhesive tape fixed on the sample holder.

***Fourier-Transform Infrared Spectroscopy (FTIR):***

On a PerkinElmer Attenuated Total Reflectance (ATR) instrument, recorded Fourier transform infrared (FTIR) spectra at atmospheric conditions with a resolution of  $4\text{ cm}^{-1}$  and 32 scans. All samples used in data collection were in the form of solid powders and spectra were recorded in the wavenumber range  $400\text{--}4000\text{ cm}^{-1}$ .

***Solubility studies:***

We assessed the solubility of drug-drug eutectic combinations in distilled water using pelletized samples obtained by compressing using a hydraulic press at a total force of  $75\text{ kg/cm}^2$ . The pellet shook continuously for 24 hours at a speed of 100 rpm using an orbital benchtop shaker and the absorbance value was measured at 250 nm using a Shimadzu UV-1800 spectrophotometer. After 24 hours shaking, the slurry was separated as the residual of the solubility test for the stability confirmation studies.

***Dissolution studies:***

The dissolution tests of pelletized ( $75\text{ kg/cm}^2$ ) samples were carried out using the USP paddle method on a Microprocessor Dissolution test apparatus (Make: ESICO International, India). Each test used 900 mL of pH 6.8 phosphate buffer as the dissolution medium. The stirring speed was set to 75 rpm and the temperature was kept constant at  $37\text{ }^\circ\text{C}$ . In the dissolution medium, accurately weighed samples containing the 300 mg eutectic mixture and added 2.5% sodium starch glycolate. After 30 minutes, about 1 mL of solution was withdrawn and filtered with a syringe filter. HPLC was used to calculate the percentage of drug availability.

### ***High-Performance Liquid Chromatography (HPLC) Analysis:***

HPLC analysis was conducted on a Shimadzu LC-20AD HPLC system with a UV detection of 250 nm using a C18 column (Phenomenex 5  $\mu\text{m}$   $\times$  4.6 mm  $\times$  250 mm column). The column temperature was set to 35 °C. The mobile phase consisted of a mixture of methanol and water solution 50% (v/v). The isocratic elution was used with a flow rate of 1 mL/min. We performed HPLC analysis on dissolution sample and pure drug (for preparing standard curve). Utilizing the standard curve of each, we determined the percentage availability of both LZD and coformer drugs.

### **Computational studies**

By extracting CSD search, we gathered the LZD and coformer's recorded crystal structure. Before running the DFT calculations hydrogen atom positions in the cluster were normalized according to the standard neutron X-H bond lengths. Using the B3LYP hybrid density functional theory model, the conformational energies of the LZD were computed in Gaussian 16. For all atoms, used 6-311+ +g(d,p) basis set. and calculated the relative energy to optimise the stable conformation of the LZD among the three polymorphs. To demonstrate the likelihood of the creation of a eutectic mixture rather than a cocrystal, we used a variety of virtual cocrystal screening techniques, including the molecular complementarity tool (MCT), molecular electrostatic potential surface (MESP), and crystal structure prediction (CSP).

a) LHAD

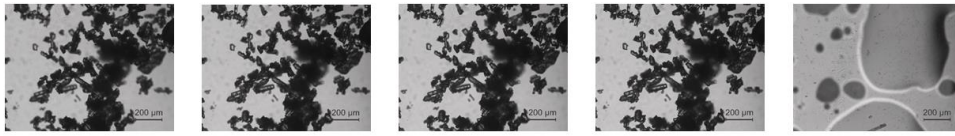

30 °C

50 °C

70 °C

90 °C

128 °C

b) LASA

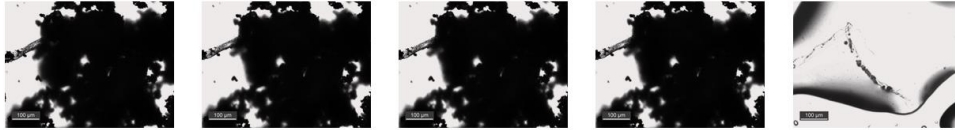

30 °C

50 °C

70 °C

90 °C

106 °C

c) LIND

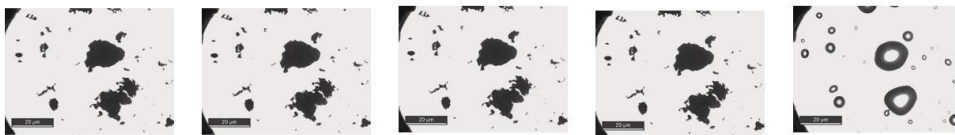

30 °C

50 °C

70 °C

90 °C

127 °C

d) LPHE

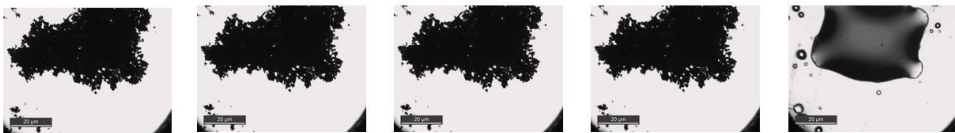

30 °C

50 °C

70 °C

90 °C

120 °C

e) LOSB

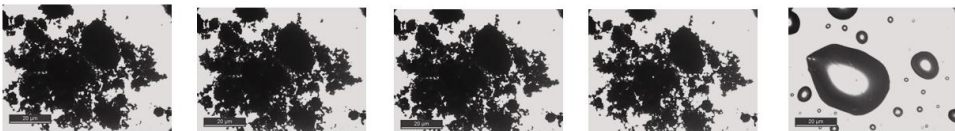

30 °C

50 °C

70 °C

90 °C

133 °C

f) LSMX

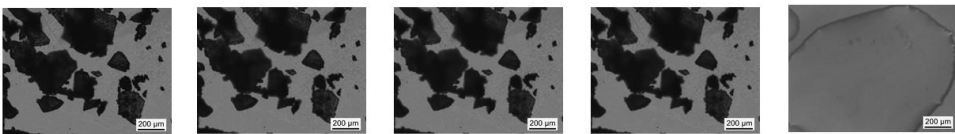

30 °C

50 °C

70 °C

90 °C

121 °C

g) LSTZ

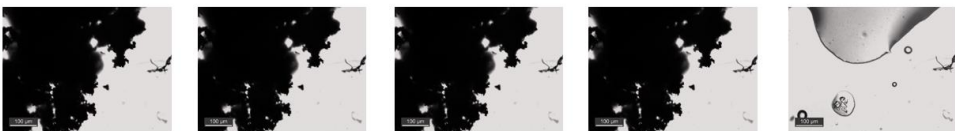

30 °C

50 °C

70 °C

90 °C

138 °C

**Fig. S1** Hot stage microscopic images of the eutectic composites.

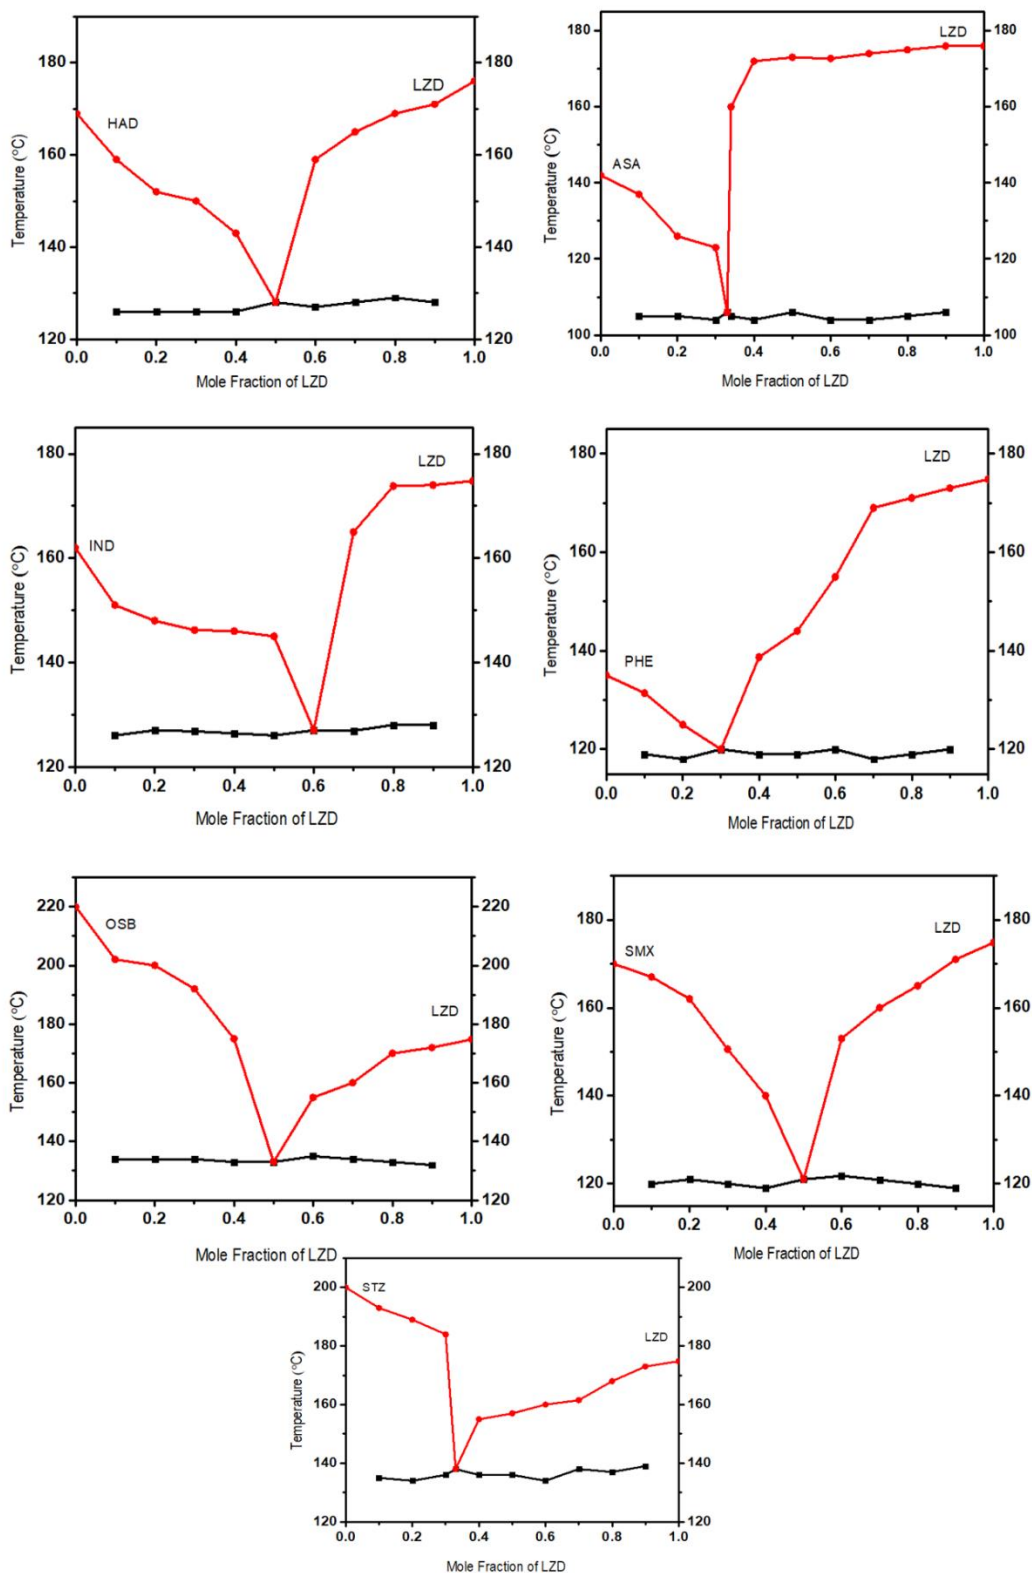

**Fig. S2** Binary phase diagram of the eutectics of LZD with HAD, ASA, IND, PHE, OSB, SMX, and STZ. Solidus points are represented as black squares and liquidus points as red circles.

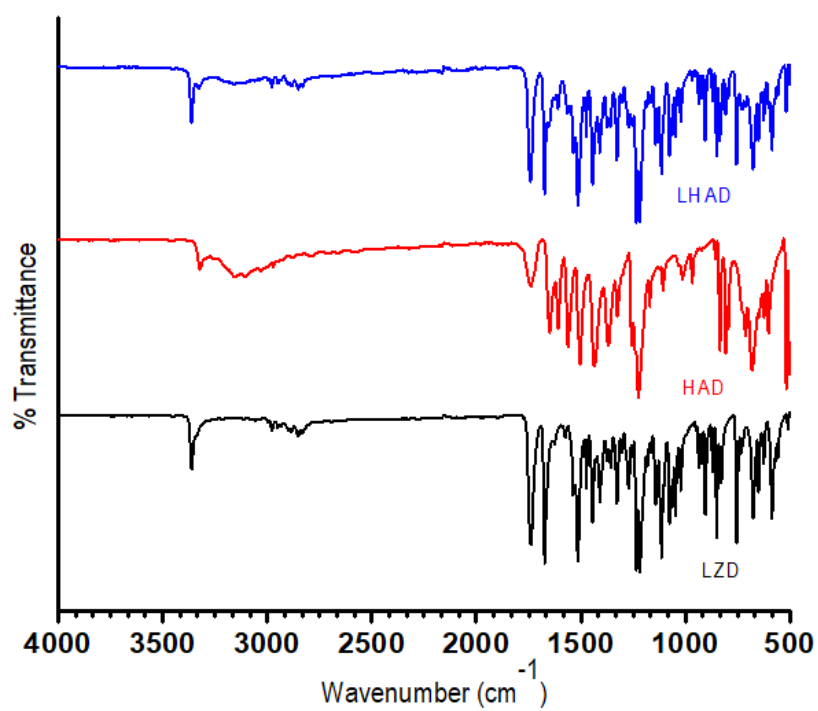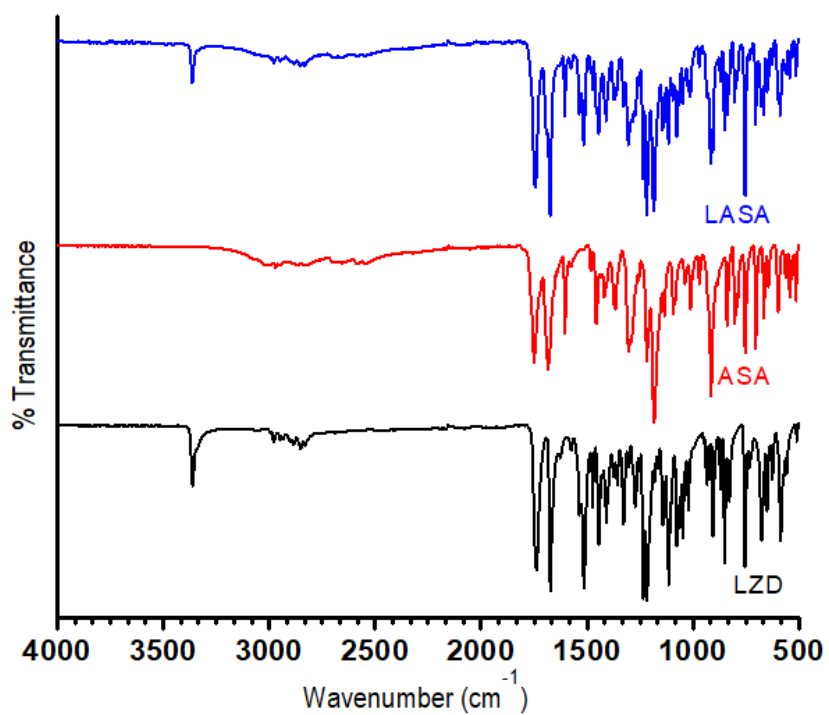

Fig. S3 IR Spectra of the eutectics of LZD with HAD, ASA



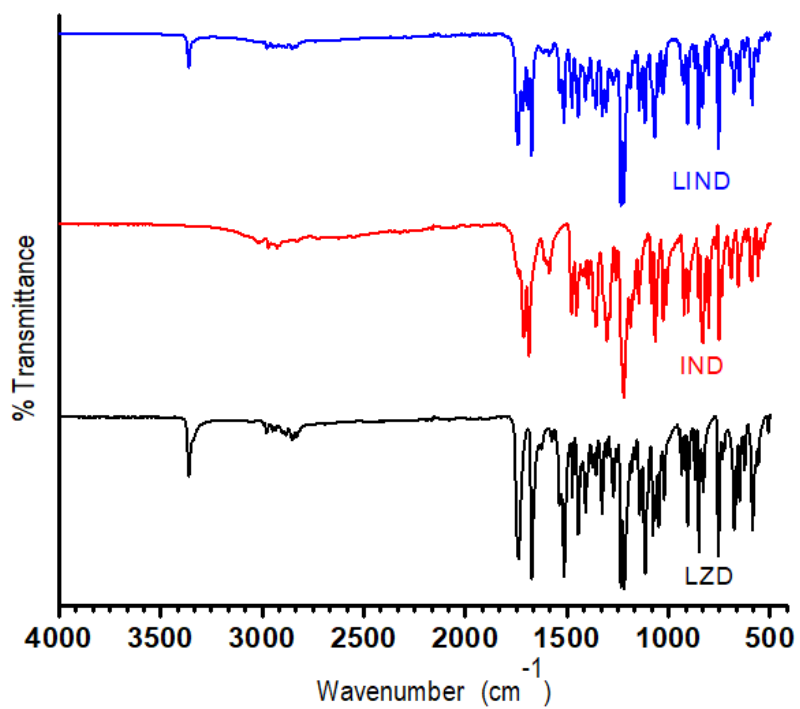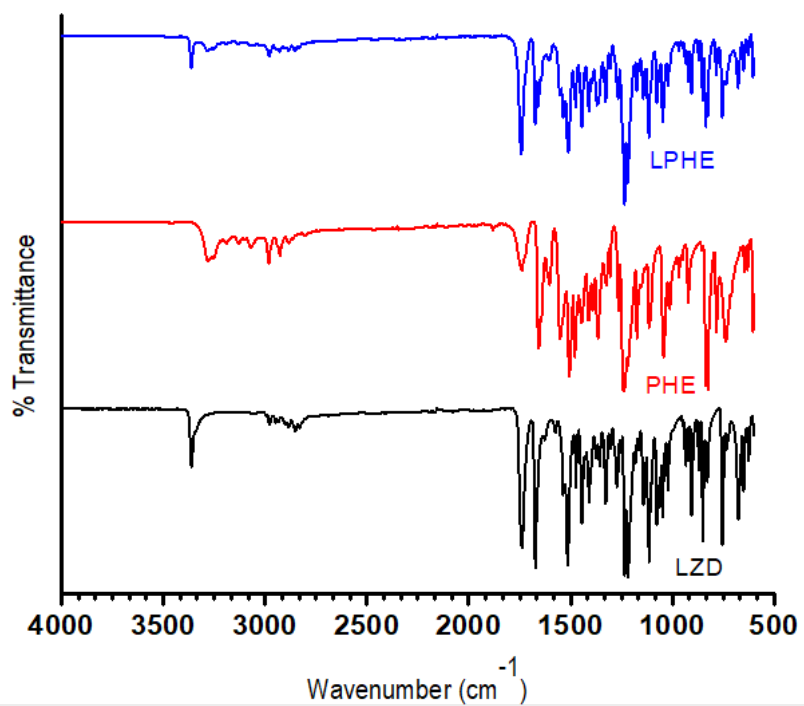

**Fig. S3 (Contd.)** IR Spectra of the eutectics of LZD with IND, PHE.

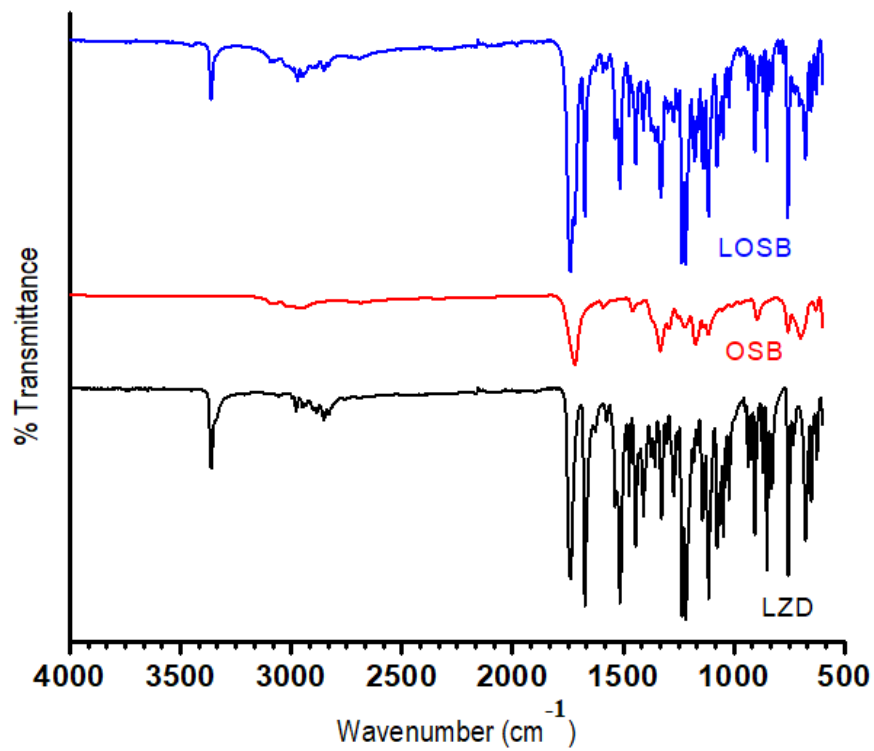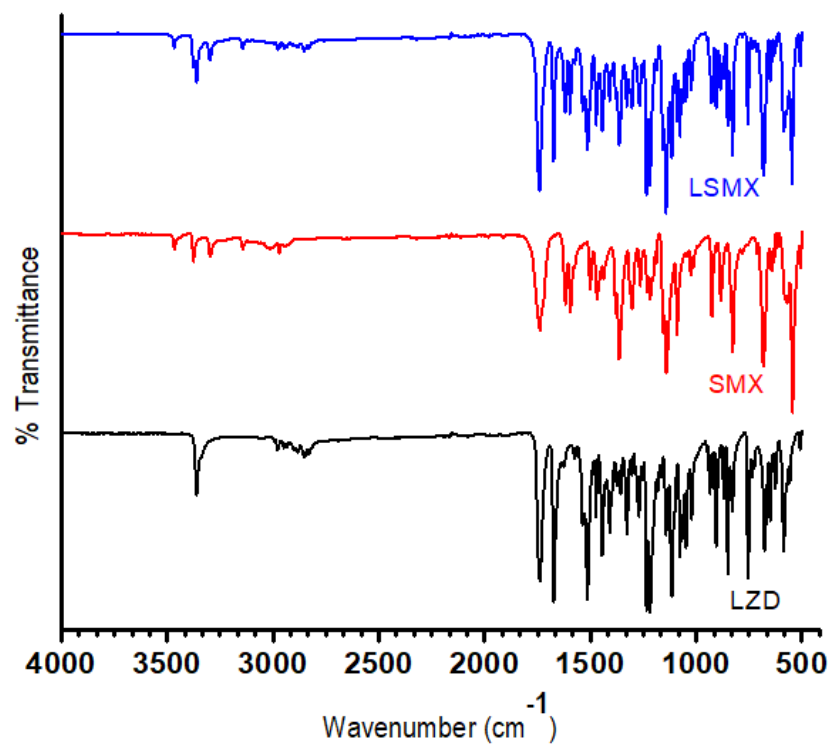

**Fig. S3 (Contd.)** IR Spectra of the eutectics of LZD with OSB, SMX.

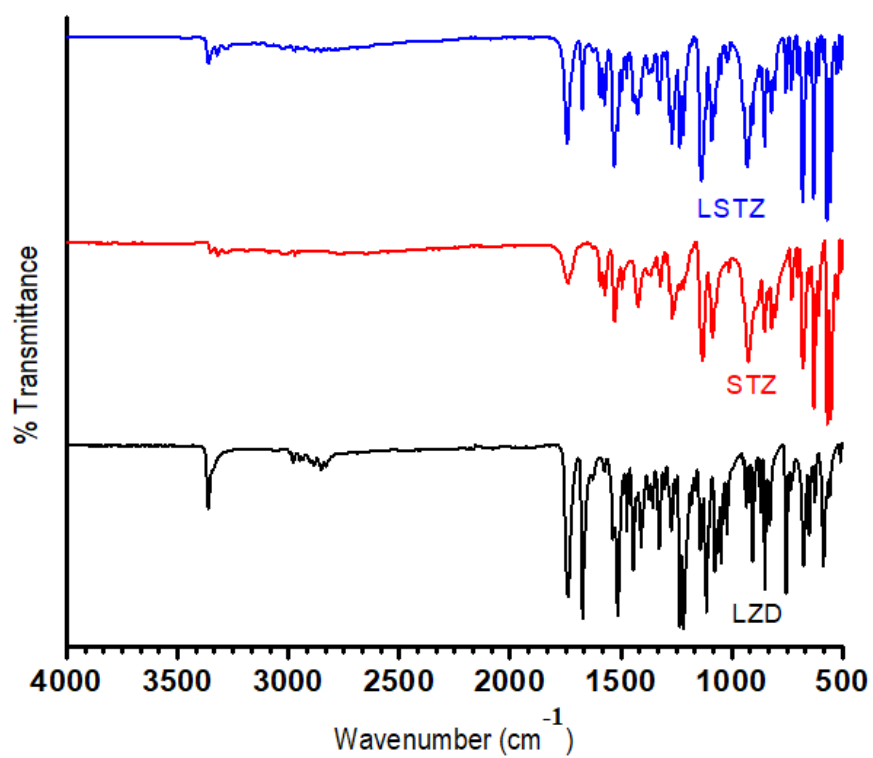

**Fig. S3 (Contd.)** IR Spectra of the eutectics of LZD with STZ.

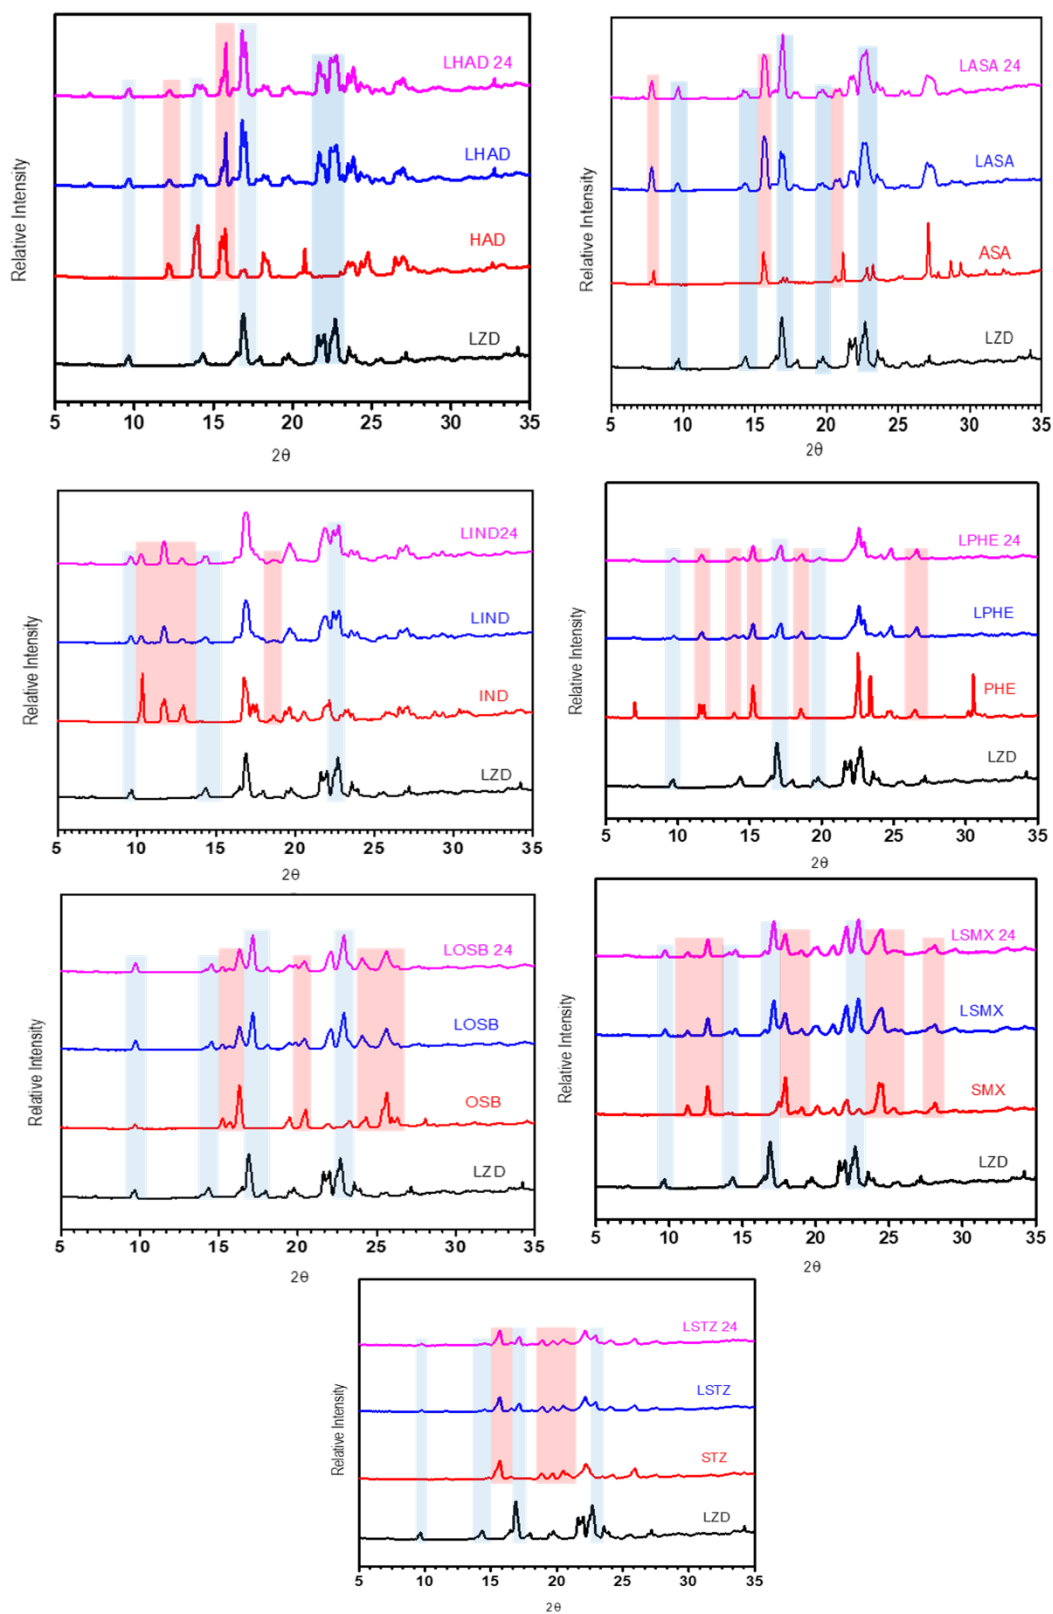

**Fig. S4** PXR D pattern of the parent drug, drug-drug eutectics, and eutectic composite equilibrated for 24 hours.

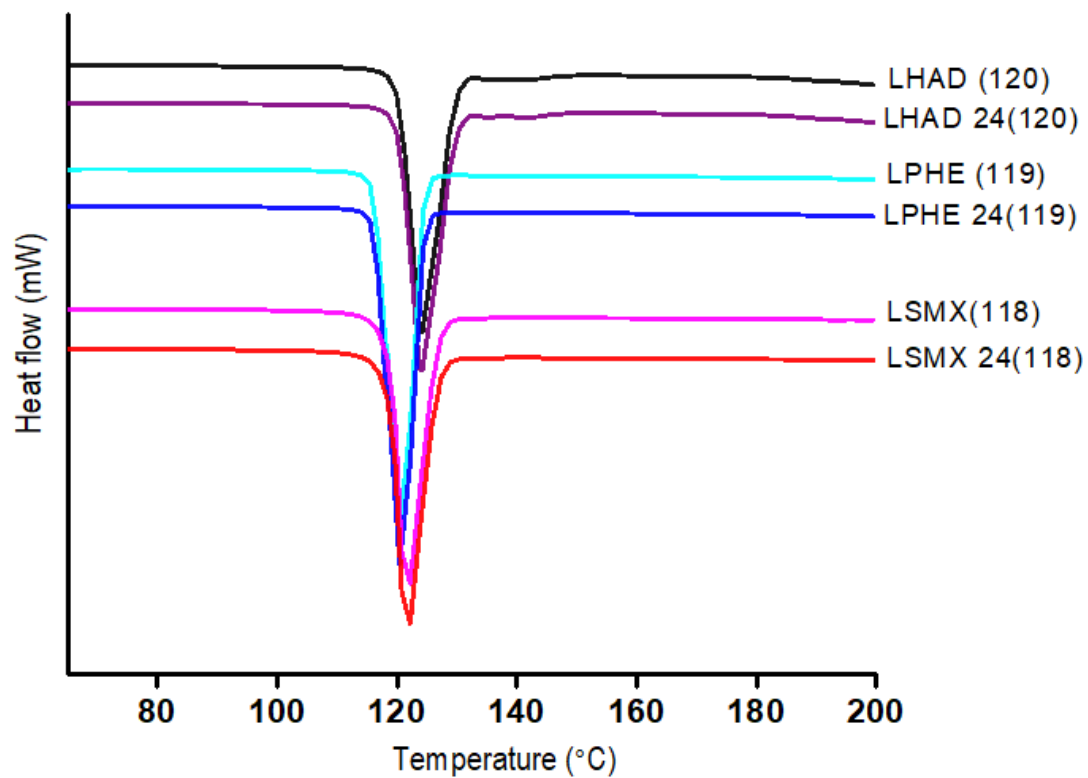

**Fig. S5** DSC of the eutectics after 24 hrs.

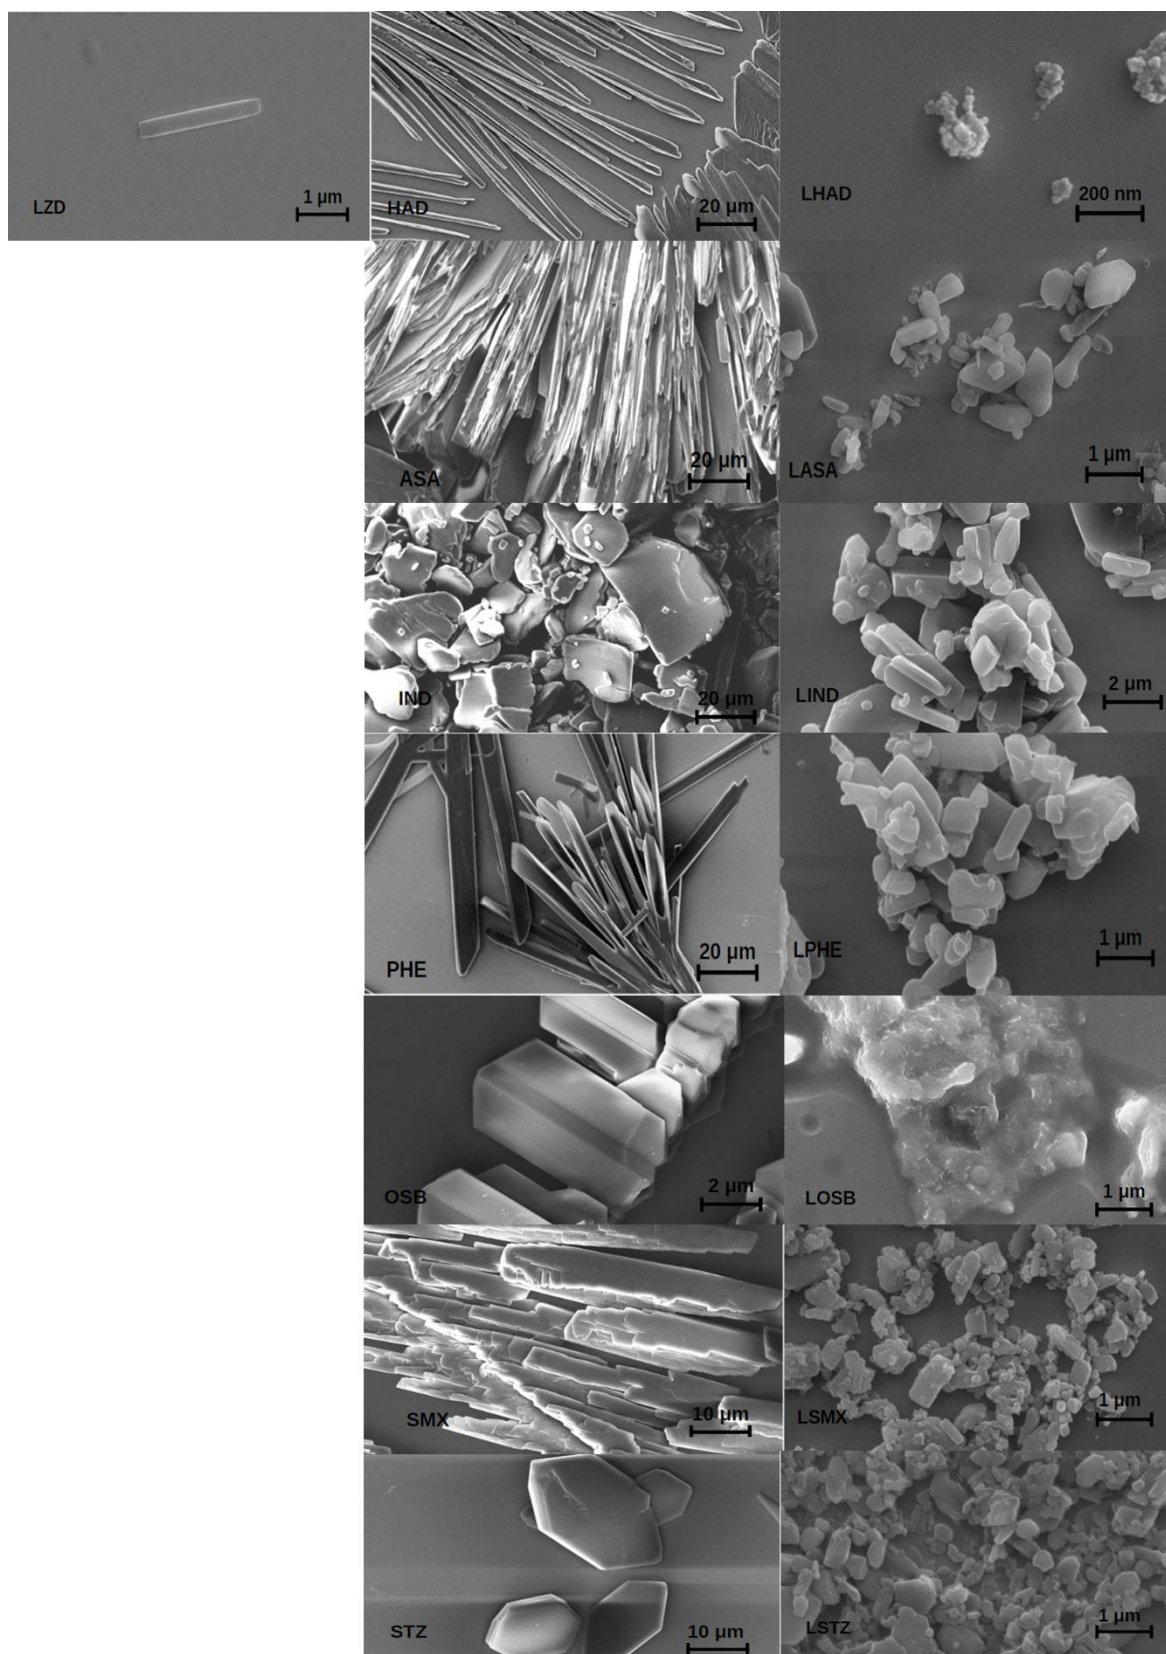

**Fig. S6** SEM micrographs of LZD and drug-drug eutectic mixtures.

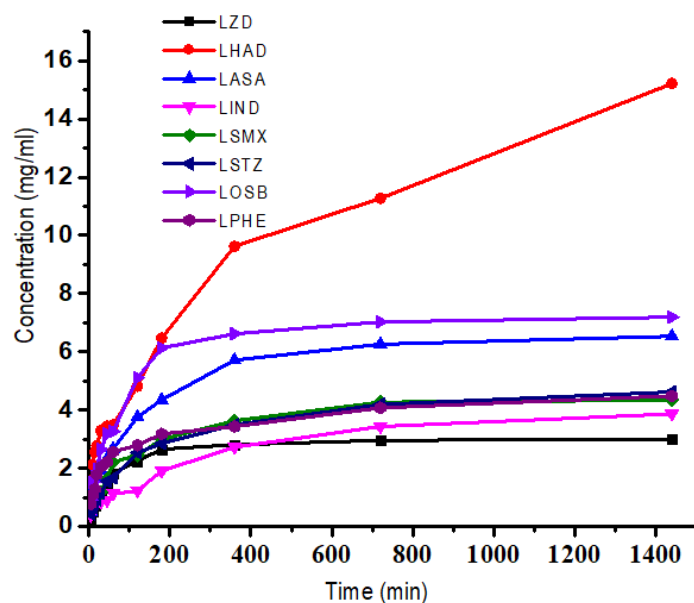

**Fig. S7** The experimentally determined solubility curve for 24 hours (1440 minutes).

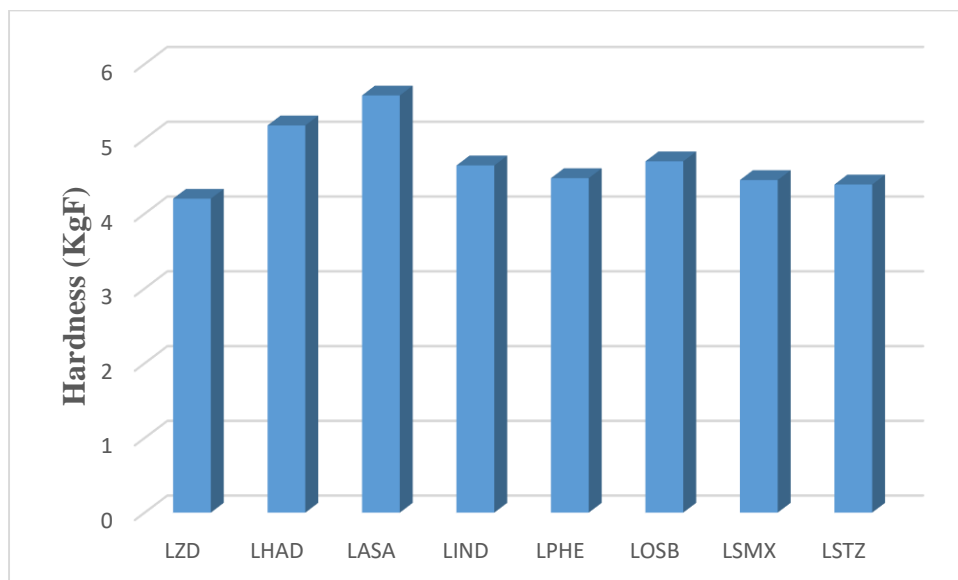

**Fig. S8** Hardness of the tablet of the eutectic composites. The tablets were prepared at 75 kg/cm<sup>2</sup> of pressure. (The eutectic mixtures for the tablet preparation were made by mechanochemical milling).

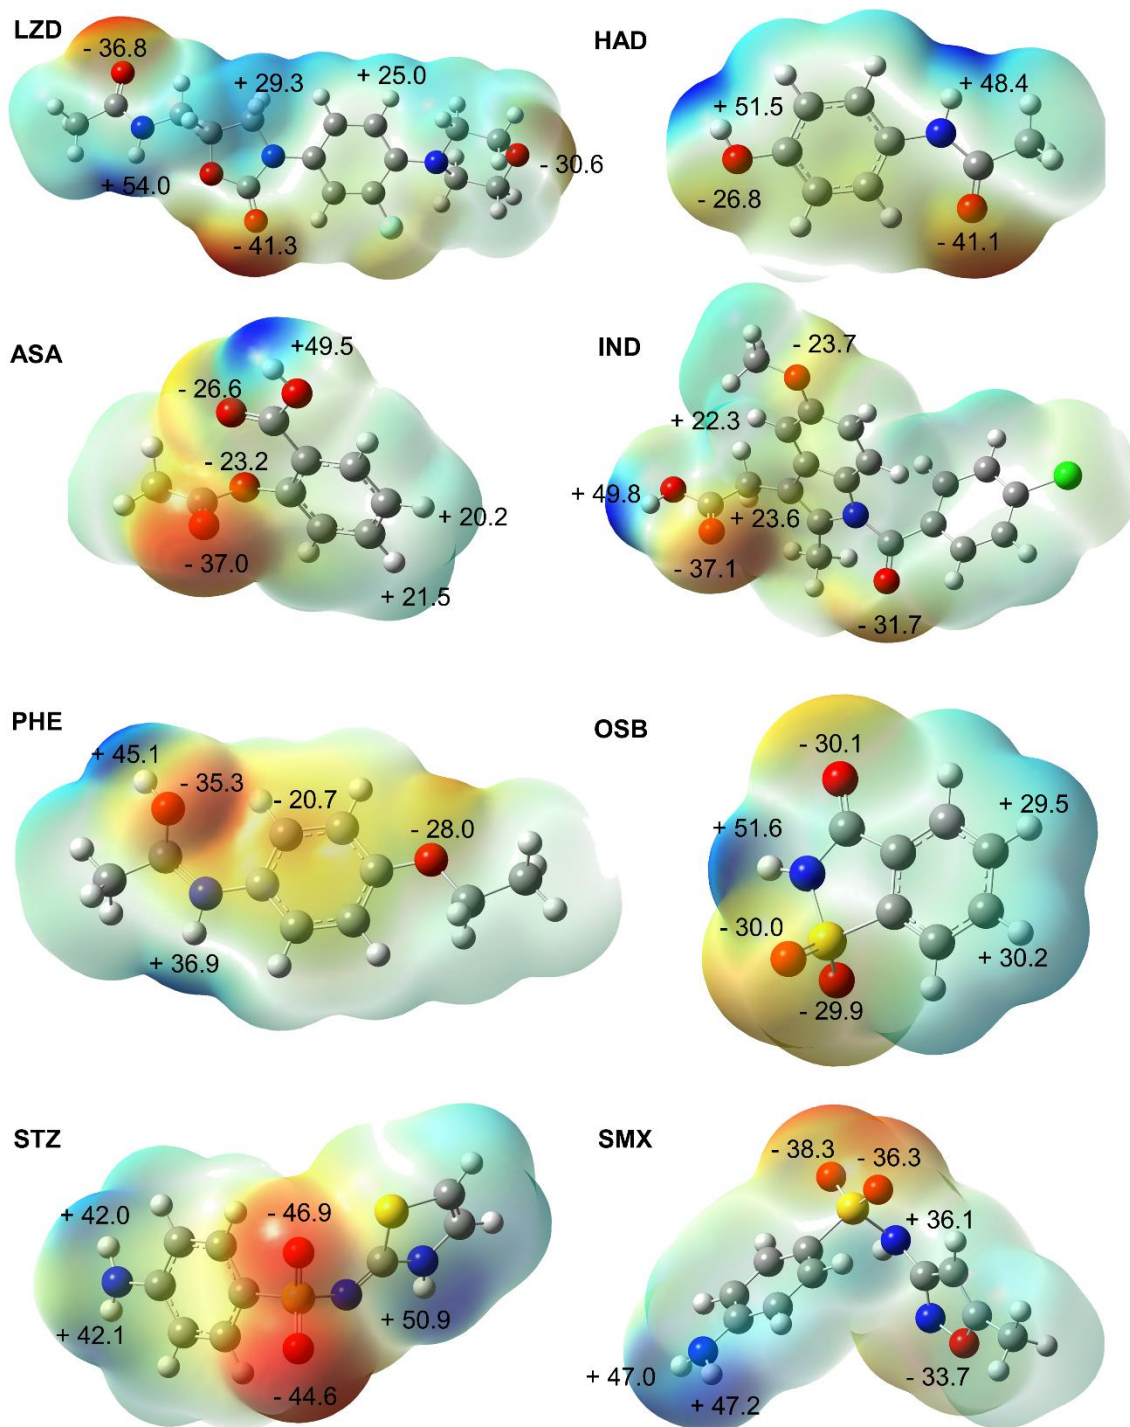

**Fig. S9** MESP surfaces of the LZD and Coformer Drugs at the B3LYP/6-311 + G(d,p)/DGDZVP level of theory. The MESP maximum and minimum energies are indicated in kcal mol<sup>-1</sup>.



**Table S1** CCDC Search result using Conquest Software revised on NOV 2022

| <b>Cofomer Structure</b>                                                          | <b>Name</b>                  | <b>CCDC Nos.</b> | <b>Cocrystal Formula</b>                                                                                                                |
|-----------------------------------------------------------------------------------|------------------------------|------------------|-----------------------------------------------------------------------------------------------------------------------------------------|
| 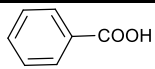 | Benzoic Acid                 | 1993998          | C <sub>16</sub> H <sub>20</sub> F N <sub>3</sub> O <sub>4</sub> ,<br>C <sub>7</sub> H <sub>6</sub> O <sub>2</sub>                       |
|  | 3,4,5-trihydroxybenzoic acid | 1993999          | C <sub>16</sub> H <sub>20</sub> F N <sub>3</sub> O <sub>4</sub> ,<br>C <sub>7</sub> H <sub>6</sub> O <sub>5</sub> ,<br>H <sub>2</sub> O |
|  | 2,6-dihydroxybenzoic acid    | 1994001          | C <sub>16</sub> H <sub>20</sub> F N <sub>3</sub> O <sub>4</sub> ,<br>C <sub>7</sub> H <sub>6</sub> O <sub>4</sub>                       |
|  | 4-hydroxybenzoic acid        | 1997194          | C <sub>16</sub> H <sub>20</sub> F N <sub>3</sub> O <sub>4</sub> ,<br>C <sub>7</sub> H <sub>6</sub> O <sub>3</sub> ,<br>H <sub>2</sub> O |
|  | 3,4- dihydroxybenzoic acid   | 1994000          | C <sub>16</sub> H <sub>20</sub> F N <sub>3</sub> O <sub>4</sub> ,<br>C <sub>7</sub> H <sub>6</sub> O <sub>4</sub> ,<br>H <sub>2</sub> O |

**Table S2** Melting Temperature multicomponent system.

|               | $T_m$ (API)<br>(°C) | $T_m$ (mixture)<br>(°C) | Remarks          | Composition<br>(mol % of LZD) |
|---------------|---------------------|-------------------------|------------------|-------------------------------|
| LZD (Form-II) | 180                 |                         |                  |                               |
| LHAD          | 169                 | 128                     | Eutectic         | 50                            |
| LASP          | 142                 | 106                     | Eutectic         | 33                            |
| LIND          | 162                 | 127                     | Eutectic         | 60                            |
| LPHE          | 135                 | 120                     | Eutectic         | 30                            |
| LOSB          | 220                 | 133                     | Eutectic         | 50                            |
| LSMX          | 170                 | 121                     | Eutectic         | 50                            |
| LSTZ          | 200                 | 138                     | Eutectic         | 33                            |
| LIBP          | 70                  | 75, 143                 | Physical mixture | —                             |
| LSCP          | 204                 | 155, 204                | Physical mixture | —                             |
| LSPY          | 200                 | 154, 200                | Physical mixture | —                             |
| LSDX          | 218                 | 155, 218                | Physical mixture | —                             |
| LSDZ          | 214                 | 180, 214                | Physical mixture | —                             |

 $T_m$ : melting temperature

**Table S3** The aqueous solubility calculated from the measured absorbance, determined solubility, and standard deviation is given below

**LZD**

| SL NO | TIME  | ABS.  | CONC. (mg/ml) |
|-------|-------|-------|---------------|
| 1     | 5 min | 0.020 | 0.237         |
| 2     | 10    | 0.044 | 0.518         |
| 3     | 15    | 0.059 | 0.693         |
| 4     | 20    | 0.073 | 0.855         |
| 5     | 30    | 0.088 | 1.030         |
| 6     | 45    | 0.114 | 1.335         |
| 7     | 60    | 0.156 | 1.824         |
| 8     | 120   | 0.192 | 2.242         |
| 9     | 180   | 0.228 | 2.652         |
| 10    | 360   | 0.241 | 2.805         |
| 11    | 600   | 0.254 | 2.954         |
| 12    | 1440  | 0.258 | 3.002         |

| TIME  | EXP 1 | EXP 2 | STDEV  |
|-------|-------|-------|--------|
| 5 min | 0.020 | 0.031 | 0.0074 |
| 10    | 0.044 | 0.056 | 0.0085 |
| 15    | 0.059 | 0.077 | 0.0123 |
| 20    | 0.073 | 0.096 | 0.0161 |
| 30    | 0.088 | 0.112 | 0.0171 |
| 45    | 0.114 | 0.146 | 0.0222 |
| 60    | 0.156 | 0.157 | 0.0007 |
| 120   | 0.192 | 0.196 | 0.0023 |
| 180   | 0.228 | 0.222 | 0.0041 |
| 360   | 0.241 | 0.251 | 0.0072 |
| 600   | 0.254 | 0.260 | 0.0045 |
| 1440  | 0.258 | 0.265 | 0.0053 |

**LHAD**

| SL NO | TIME  | ABS.  | CONC. (mg/ml) |
|-------|-------|-------|---------------|
| 1     | 5 min | 0.129 | 1.506         |
| 2     | 10    | 0.182 | 2.122         |
| 3     | 15    | 0.219 | 2.556         |
| 4     | 20    | 0.239 | 2.779         |
| 5     | 30    | 0.283 | 3.291         |
| 6     | 45    | 0.296 | 3.449         |
| 7     | 60    | 0.3   | 3.489         |
| 8     | 120   | 0.414 | 4.814         |
| 9     | 180   | 0.556 | 6.472         |
| 10    | 360   | 0.827 | 9.623         |
| 11    | 600   | 0.969 | 11.269        |
| 12    | 1440  | 1.308 | 15.212        |

| TIME  | EXP 1 | EXP 2 | STDEV  |
|-------|-------|-------|--------|
| 5 min | 0.129 | 0.125 | 0.0028 |
| 10    | 0.182 | 0.188 | 0.0039 |
| 15    | 0.219 | 0.239 | 0.0135 |
| 20    | 0.239 | 0.258 | 0.0140 |
| 30    | 0.283 | 0.318 | 0.0248 |
| 45    | 0.296 | 0.325 | 0.0200 |
| 60    | 0.3   | 0.347 | 0.0335 |
| 120   | 0.414 | 0.584 | 0.1205 |
| 180   | 0.556 | 0.618 | 0.0438 |
| 360   | 0.827 | 0.873 | 0.0321 |
| 600   | 0.969 | 0.918 | 0.0360 |
| 1440  | 1.308 | 1.192 | 0.0820 |

## LASA

| SL NO | TIME  | ABS.  | CONC. (mg/ml) |
|-------|-------|-------|---------------|
| 1     | 5 min | 0.043 | 0.501         |
| 2     | 10    | 0.115 | 1.347         |
| 3     | 15    | 0.114 | 1.325         |
| 4     | 20    | 0.146 | 1.697         |
| 5     | 30    | 0.165 | 1.918         |
| 6     | 45    | 0.199 | 2.320         |
| 7     | 60    | 0.229 | 2.663         |
| 8     | 120   | 0.322 | 3.750         |
| 9     | 180   | 0.373 | 4.343         |
| 10    | 360   | 0.491 | 5.710         |
| 11    | 600   | 0.538 | 6.257         |
| 12    | 1440  | 0.561 | 6.530         |

| TIME  | EXP 1 | EXP 2 | STDEV  |
|-------|-------|-------|--------|
| 5 min | 0.043 | 0.076 | 0.0236 |
| 10    | 0.115 | 0.116 | 0.0004 |
| 15    | 0.114 | 0.159 | 0.0321 |
| 20    | 0.146 | 0.173 | 0.0190 |
| 30    | 0.165 | 0.231 | 0.0470 |
| 45    | 0.199 | 0.262 | 0.0441 |
| 60    | 0.229 | 0.303 | 0.0523 |
| 120   | 0.322 | 0.379 | 0.0403 |
| 180   | 0.373 | 0.432 | 0.0413 |
| 360   | 0.491 | 0.473 | 0.0123 |
| 600   | 0.538 | 0.496 | 0.0293 |
| 1440  | 0.561 | 0.532 | 0.0208 |

## LIND

| SL NO | TIME  | ABS.  | CONC. (mg/ml) |
|-------|-------|-------|---------------|
| 1     | 5 min | 0.033 | 0.383         |
| 2     | 10    | 0.057 | 0.662         |
| 3     | 15    | 0.062 | 0.721         |
| 4     | 20    | 0.066 | 0.767         |
| 5     | 30    | 0.074 | 0.860         |
| 6     | 45    | 0.078 | 0.907         |
| 7     | 60    | 0.096 | 1.116         |
| 8     | 120   | 0.105 | 1.221         |
| 9     | 180   | 0.164 | 1.907         |
| 10    | 360   | 0.234 | 2.721         |
| 11    | 600   | 0.295 | 3.430         |
| 12    | 1440  | 0.332 | 3.861         |

| TIME  | EXP 1 | EXP 2 | STDEV  |
|-------|-------|-------|--------|
| 5 min | 0.033 | 0.038 | 0.0035 |
| 10    | 0.057 | 0.059 | 0.0014 |
| 15    | 0.062 | 0.068 | 0.0042 |
| 20    | 0.066 | 0.083 | 0.0120 |
| 30    | 0.074 | 0.108 | 0.0240 |
| 45    | 0.078 | 0.103 | 0.0176 |
| 60    | 0.096 | 0.134 | 0.0268 |
| 120   | 0.105 | 0.194 | 0.0629 |
| 180   | 0.164 | 0.212 | 0.0339 |
| 360   | 0.234 | 0.266 | 0.0226 |
| 600   | 0.295 | 0.292 | 0.0021 |
| 1440  | 0.332 | 0.3   | 0.0226 |

**LPHE**

| SL NO | TIME  | ABS.  | CONC. (mg/ml) |
|-------|-------|-------|---------------|
| 1     | 5 min | 0.066 | 0.767         |
| 2     | 10    | 0.094 | 1.093         |
| 3     | 15    | 0.11  | 1.279         |
| 4     | 20    | 0.153 | 1.779         |
| 5     | 30    | 0.176 | 2.046         |
| 6     | 45    | 0.19  | 2.209         |
| 7     | 60    | 0.22  | 2.558         |
| 8     | 120   | 0.24  | 2.791         |
| 9     | 180   | 0.273 | 3.175         |
| 10    | 360   | 0.295 | 3.430         |
| 11    | 600   | 0.35  | 4.070         |
| 12    | 1440  | 0.385 | 4.477         |

| TIME  | EXP 1 | EXP 2 | STDEV  |
|-------|-------|-------|--------|
| 5 min | 0.066 | 0.078 | 0.0084 |
| 10    | 0.094 | 0.95  | 0.6052 |
| 15    | 0.11  | 0.12  | 0.0070 |
| 20    | 0.153 | 0.14  | 0.0091 |
| 30    | 0.176 | 0.187 | 0.0077 |
| 45    | 0.19  | 0.2   | 0.0070 |
| 60    | 0.22  | 0.21  | 0.0070 |
| 120   | 0.24  | 0.238 | 0.0014 |
| 180   | 0.273 | 0.28  | 0.0049 |
| 360   | 0.295 | 0.3   | 0.0035 |
| 600   | 0.35  | 0.34  | 0.0070 |
| 1440  | 0.385 | 0.38  | 0.0035 |

**LOSB**

| SL NO | TIME  | ABS.  | CONC. (mg/ml) |
|-------|-------|-------|---------------|
| 1     | 5 min | 0.078 | 0.907         |
| 2     | 10    | 0.13  | 1.511         |
| 3     | 15    | 0.147 | 1.709         |
| 4     | 20    | 0.168 | 1.953         |
| 5     | 30    | 0.228 | 2.651         |
| 6     | 45    | 0.273 | 3.175         |
| 7     | 60    | 0.28  | 3.256         |
| 8     | 120   | 0.439 | 5.105         |
| 9     | 180   | 0.527 | 6.129         |
| 10    | 360   | 0.569 | 6.617         |
| 11    | 600   | 0.604 | 7.024         |
| 12    | 1440  | 0.618 | 7.187         |

| TIME  | EXP 1 | EXP 2 | STDEV  |
|-------|-------|-------|--------|
| 5 min | 0.078 | 0.069 | 0.0063 |
| 10    | 0.13  | 0.124 | 0.0042 |
| 15    | 0.147 | 0.156 | 0.0063 |
| 20    | 0.168 | 0.174 | 0.0042 |
| 30    | 0.228 | 0.236 | 0.0056 |
| 45    | 0.273 | 0.265 | 0.0056 |
| 60    | 0.28  | 0.282 | 0.0014 |
| 120   | 0.439 | 0.424 | 0.0106 |
| 180   | 0.527 | 0.464 | 0.0445 |
| 360   | 0.569 | 0.548 | 0.0148 |
| 600   | 0.604 | 0.551 | 0.0374 |
| 1440  | 0.618 | 0.598 | 0.0141 |

**LSMX**

| SL NO | TIME  | ABS.  | CONC. (mg/ml) |
|-------|-------|-------|---------------|
| 1     | 5 min | 0.063 | 0.732         |
| 2     | 10    | 0.07  | 0.814         |
| 3     | 15    | 0.084 | 0.976         |
| 4     | 20    | 0.088 | 1.023         |
| 5     | 30    | 0.101 | 1.174         |
| 6     | 45    | 0.14  | 1.628         |
| 7     | 60    | 0.19  | 2.209         |
| 8     | 120   | 0.21  | 2.442         |
| 9     | 180   | 0.257 | 2.988         |
| 10    | 360   | 0.312 | 3.628         |
| 11    | 600   | 0.367 | 4.268         |
| 12    | 1440  | 0.373 | 4.338         |

| TIME  | EXP 1 | EXP 2 | STDEV  |
|-------|-------|-------|--------|
| 5 min | 0.063 | 0.055 | 0.0056 |
| 10    | 0.07  | 0.08  | 0.0070 |
| 15    | 0.084 | 0.09  | 0.0042 |
| 20    | 0.088 | 0.101 | 0.0091 |
| 30    | 0.101 | 0.12  | 0.0134 |
| 45    | 0.14  | 0.134 | 0.0042 |
| 60    | 0.19  | 0.184 | 0.0042 |
| 120   | 0.21  | 0.235 | 0.0176 |
| 180   | 0.257 | 0.249 | 0.0056 |
| 360   | 0.312 | 0.31  | 0.0014 |
| 600   | 0.367 | 0.34  | 0.0190 |
| 1440  | 0.373 | 0.356 | 0.0120 |

**LSTZ**

| SL NO | TIME  | ABS.  | CONC. (mg/ml) |
|-------|-------|-------|---------------|
| 1     | 5 min | 0.037 | 0.430         |
| 2     | 10    | 0.055 | 0.639         |
| 3     | 15    | 0.069 | 0.802         |
| 4     | 20    | 0.08  | 0.930         |
| 5     | 30    | 0.098 | 1.139         |
| 6     | 45    | 0.133 | 1.546         |
| 7     | 60    | 0.143 | 1.663         |
| 8     | 120   | 0.218 | 2.535         |
| 9     | 180   | 0.245 | 2.849         |
| 10    | 360   | 0.3   | 3.489         |
| 11    | 600   | 0.36  | 4.186         |
| 12    | 1440  | 0.397 | 4.617         |

| TIME  | EXP 1 | EXP 2 | STDEV  |
|-------|-------|-------|--------|
| 5 min | 0.037 | 0.049 | 0.0084 |
| 10    | 0.055 | 0.061 | 0.0042 |
| 15    | 0.069 | 0.079 | 0.0070 |
| 20    | 0.08  | 0.082 | 0.0014 |
| 30    | 0.098 | 0.097 | 0.0007 |
| 45    | 0.133 | 0.14  | 0.0049 |
| 60    | 0.143 | 0.154 | 0.0077 |
| 120   | 0.218 | 0.22  | 0.0014 |
| 180   | 0.245 | 0.263 | 0.0127 |
| 360   | 0.3   | 0.31  | 0.0070 |
| 600   | 0.36  | 0.35  | 0.0070 |
| 1440  | 0.397 | 0.41  | 0.0091 |

**Table S4** The % availability of LZD in drug-drug eutectic mixture

|      | % Amount of LZ |       | STD DEV |
|------|----------------|-------|---------|
| LZD  | 96.26          | 97.16 | 0.632   |
| LHAD | 93.46          | 92.81 | 0.462   |
| LASA | 88.83          | 90.02 | 0.844   |
| LPHE | 74.60          | 74.70 | 0.072   |
| LOSB | 93.46          | 93.75 | 0.207   |
| LSMX | 76.80          | 75.51 | 0.909   |
| LSTZ | 88.94          | 88.05 | 0.628   |

**Table S5** The % availability of coformer drug in drug-drug eutectic mixture

|      | % Availability of coformer drug in drug-drug eutectic mixture |       | STD DEV | EXPECTED AS PER USP | EXPECTED AS PER IP |
|------|---------------------------------------------------------------|-------|---------|---------------------|--------------------|
| LHAD | 90.12                                                         | 91.51 | 0.982   | > 80%<br>30 MIN     | > 80%<br>30 MIN    |
| LASA | 85.74                                                         | 85.73 | 0.009   | >80%<br>30 MIN      | >70%<br>45 MIN     |
| LPHE | 74.10                                                         | 74.53 | 0.299   | NA                  | NA                 |
| LOSB | 94.16                                                         | 95.09 | 0.654   | NA                  | NA                 |
| LSMX | 77.96                                                         | 77.60 | 0.256   | > 70%<br>60 MIN     | NA                 |
| LSTZ | 87.53                                                         | 86.44 | 0.767   | NA                  | NA                 |
